# Supplementary material for: Acceptance of a Third Dose of COVID-19 Vaccine and Associated Factors in China Based on Health Belief Model: A National Cross-Sectional Study
Source: MDPI journal article supplement (doi:10.3390/vaccines10010089), 2022-01-07
Supplement: s1 [file s1]

**Supplemental file****Table S1** Collection of valid questionnaires by region in mainland China

| Regions                              | Number | Proportion |
|--------------------------------------|--------|------------|
| Guangdong Province                   | 272    | 8.72%      |
| Shandong Province                    | 233    | 7.47%      |
| Henan Province                       | 228    | 7.31%      |
| Jiangsu Province                     | 186    | 5.96%      |
| Sichuan Province                     | 186    | 5.96%      |
| Hebei Province                       | 168    | 5.39%      |
| Hunan Province                       | 151    | 4.84%      |
| Zhejiang Province                    | 147    | 4.71%      |
| Anhui Province                       | 140    | 4.49%      |
| Hubei Province                       | 132    | 4.23%      |
| Guangxi Province                     | 116    | 3.72%      |
| Jiangxi Province                     | 105    | 3.37%      |
| Liaoning Province                    | 96     | 3.08%      |
| Fujian Province                      | 95     | 3.05%      |
| Shaanxi Province                     | 92     | 2.95%      |
| Guizhou Province                     | 88     | 2.82%      |
| Shanxi Province                      | 76     | 2.44%      |
| Chongqing                            | 74     | 2.37%      |
| Heilongjiang Province                | 74     | 2.37%      |
| Yunnan Province                      | 66     | 2.12%      |
| the Nei Monggol Autonomous Region    | 57     | 1.83%      |
| Jilin Province                       | 56     | 1.80%      |
| Shanghai                             | 55     | 1.76%      |
| Gansu Province                       | 51     | 1.64%      |
| Beijing                              | 49     | 1.57%      |
| the Xinjiang Uygur Autonomous Region | 41     | 1.31%      |
| Tianjin                              | 31     | 0.99%      |
| Hainan Province                      | 25     | 0.80%      |
| Ningxia Province                     | 18     | 0.58%      |
| Tibet                                | 7      | 0.22%      |
| Qinghai Province                     | 4      | 0.13%      |
